# Supplementary material
Source: PubMed Central journal article supplement (PMC4450332)

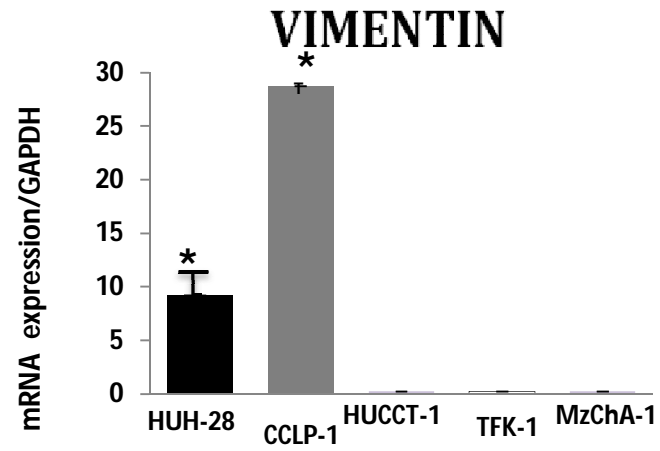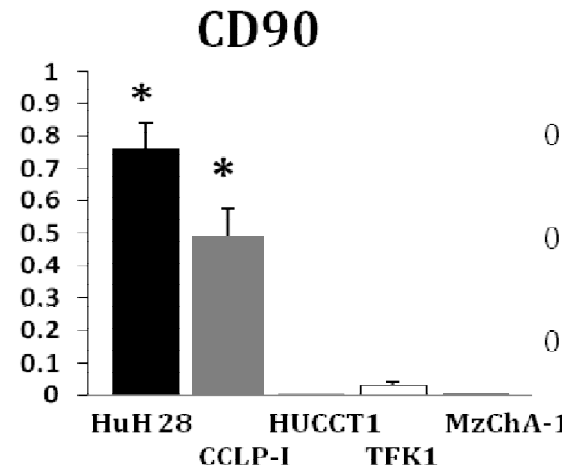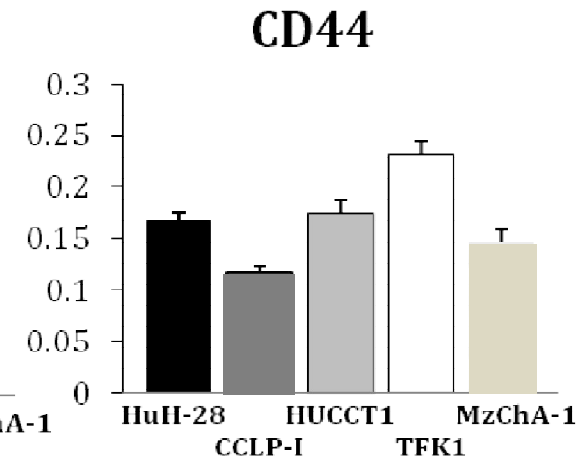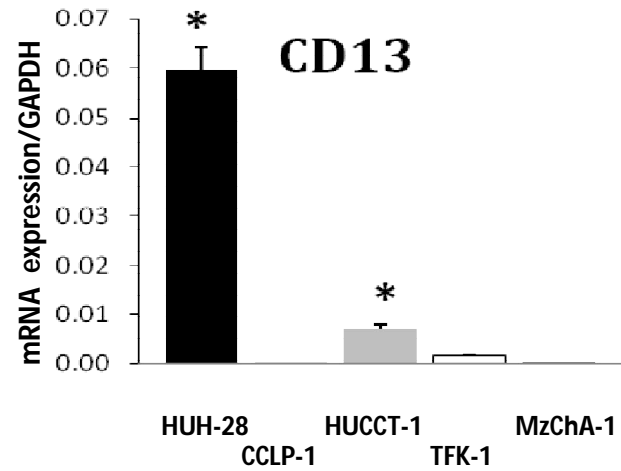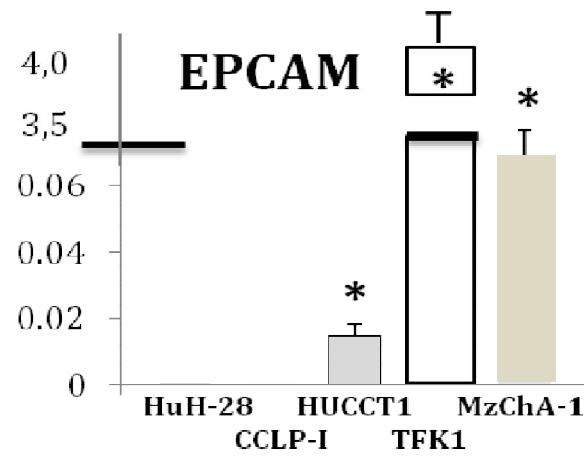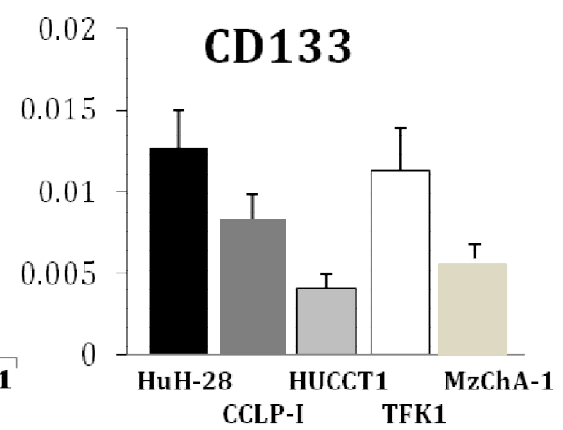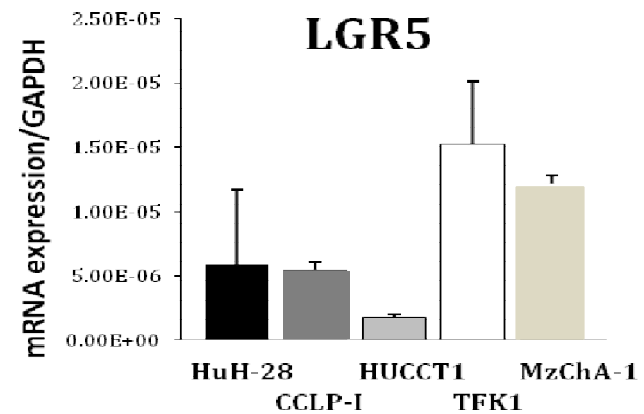

**Supplementary Figure 1**

Supplement: mmc1.pdf [file mmc1.pdf]

## Supplementary Figure 2

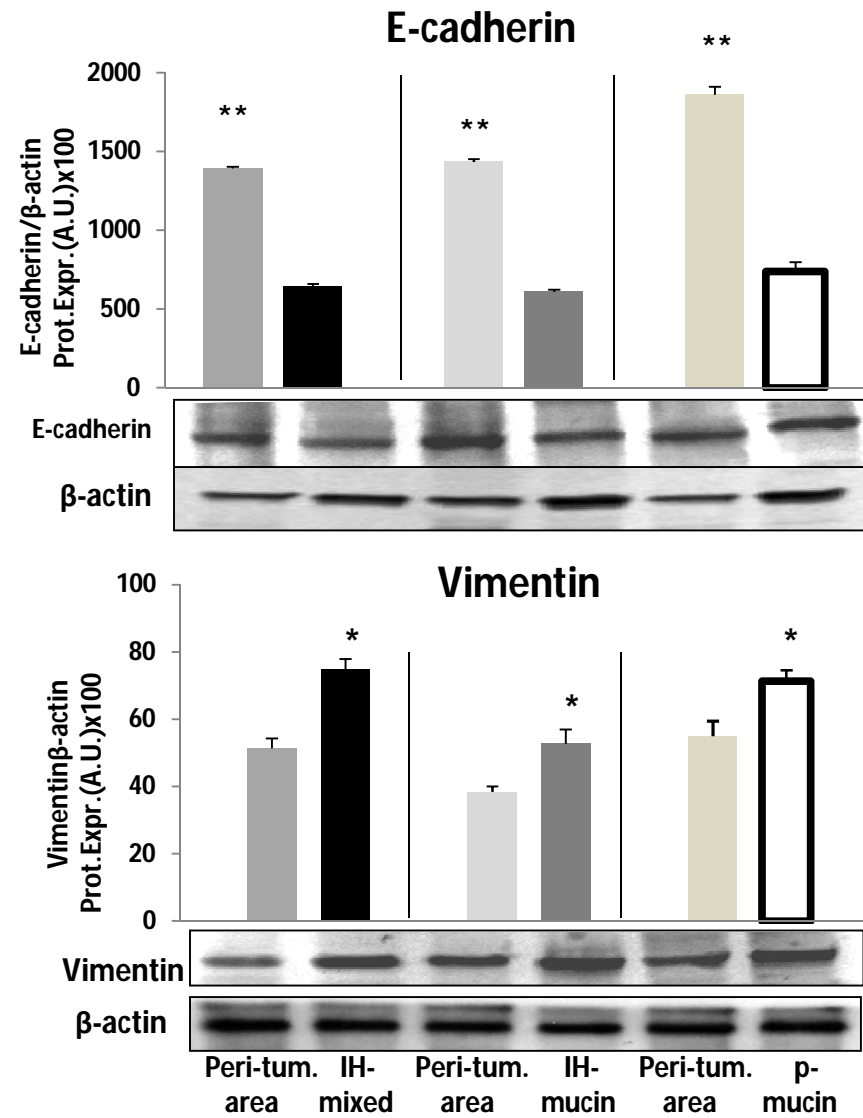

Supplement: mmc2.pdf [file mmc2.pdf]

# Supplementary Figure 3

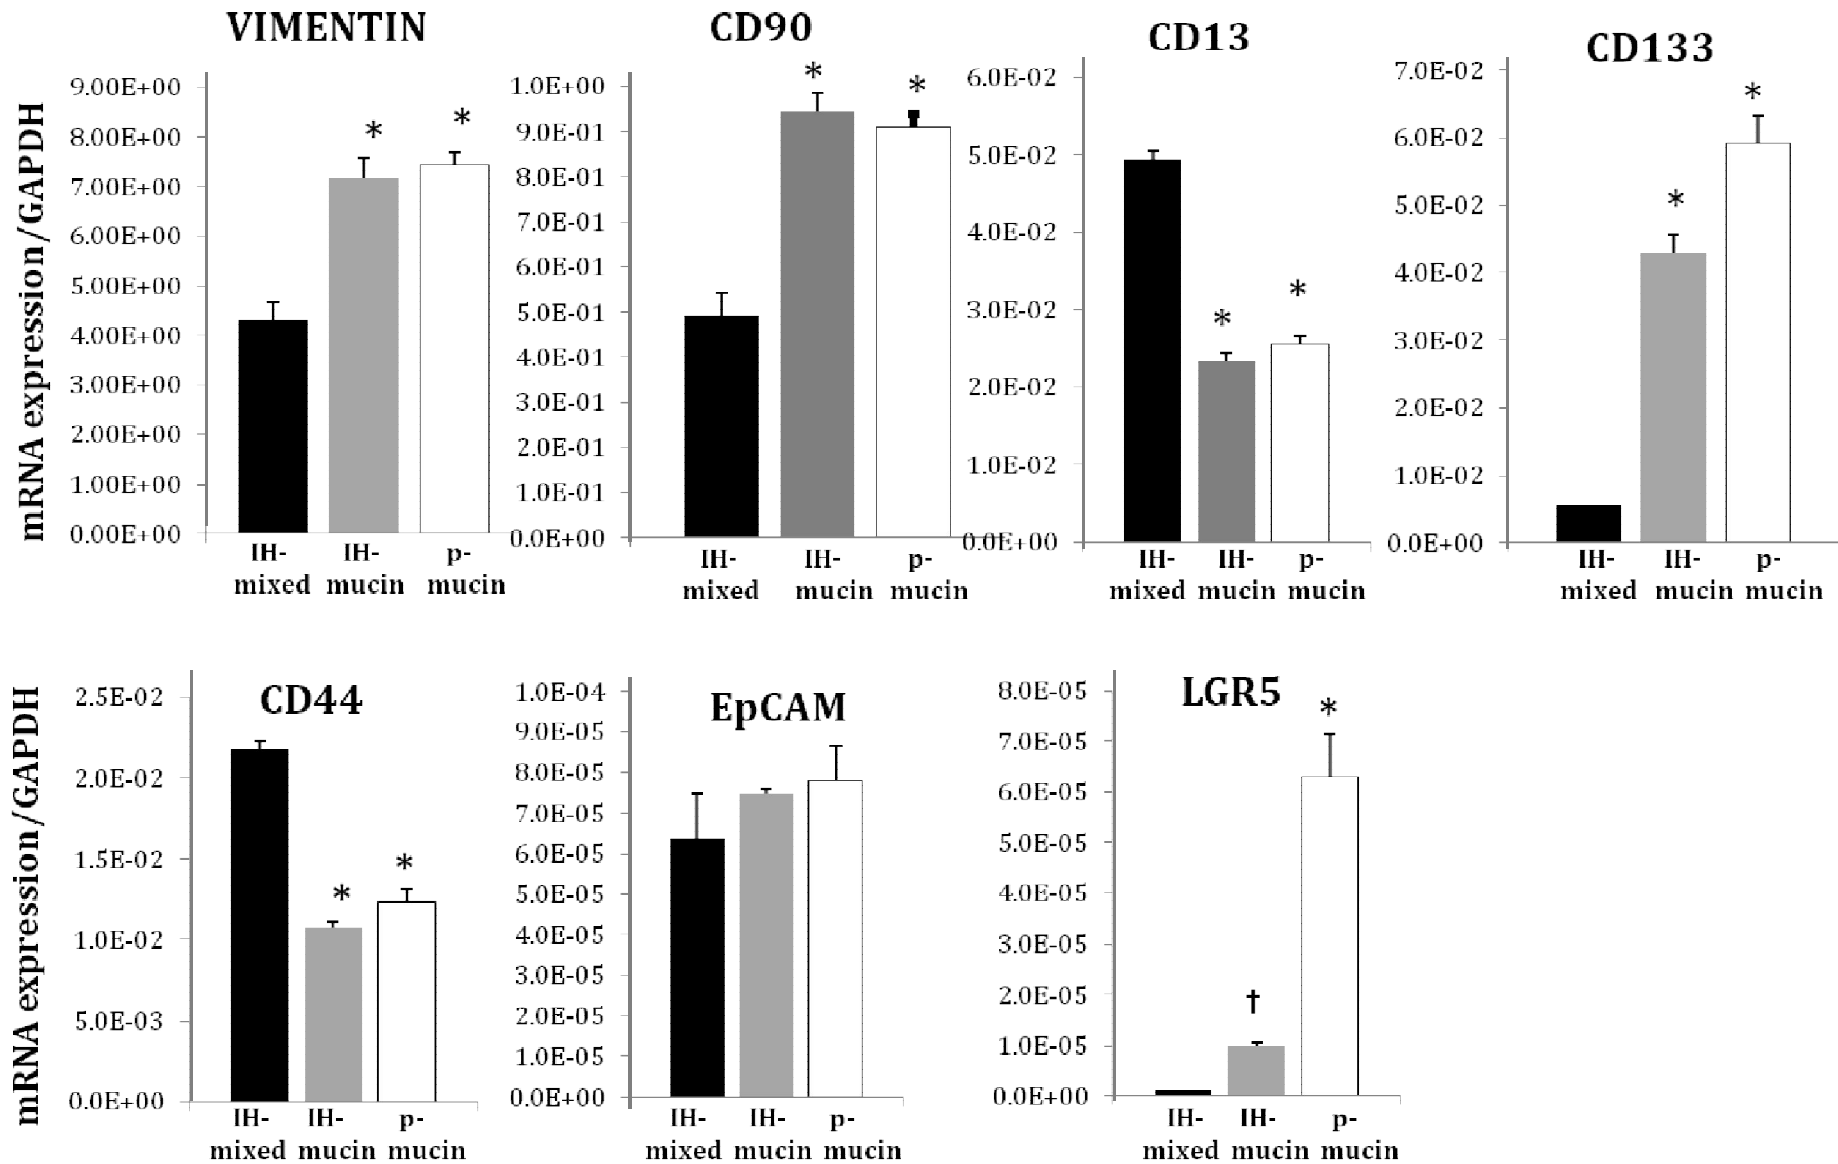

Supplement: mmc3.pdf [file mmc3.pdf]

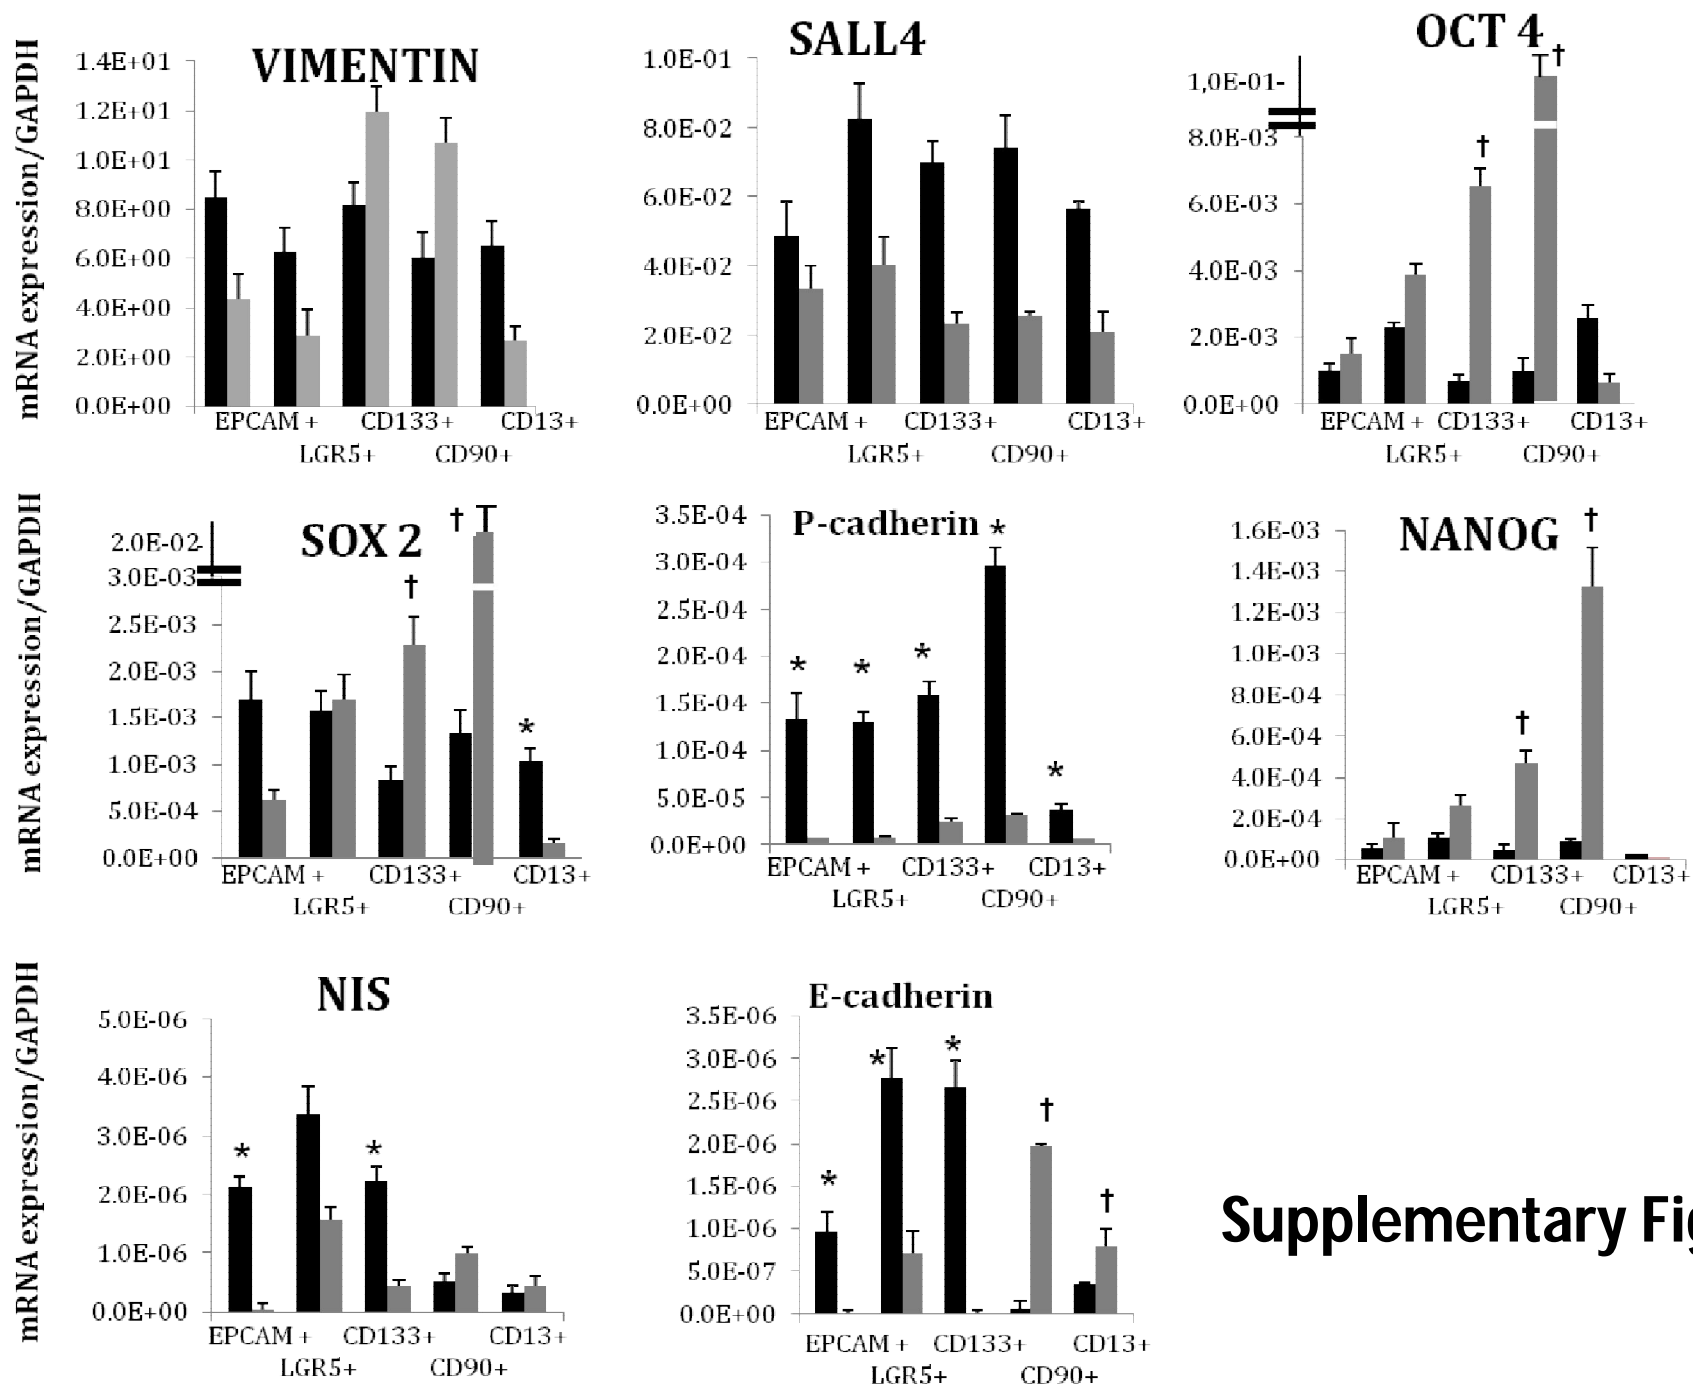

Supplementary Figure 4

Supplement: mmc4.pdf [file mmc4.pdf]
